# Supplementary material for: Identification of Noncoding Transcripts from within CENP-A Chromatin at Fission Yeast Centromeres
Source: PubMed Central journal article supplement — J Biol Chem. 2011 Apr 29;286(26):23600–7. doi: 10.1074/jbc.M111.228510 (PMC3123123; doi:10.1074/jbc.m111.228510), 2011-04-29
Supplement: supp_M111.228510_jbc.M111.228510-1.pdf [file supp_M111.228510_jbc.M111.228510-1.pdf]

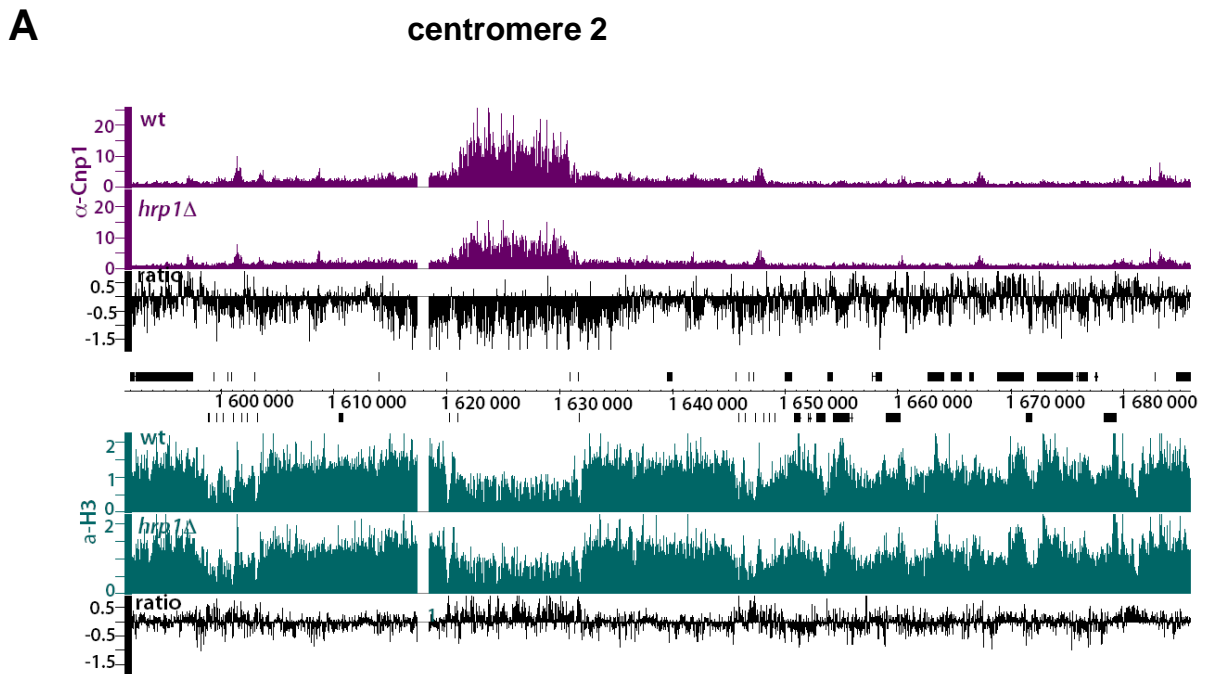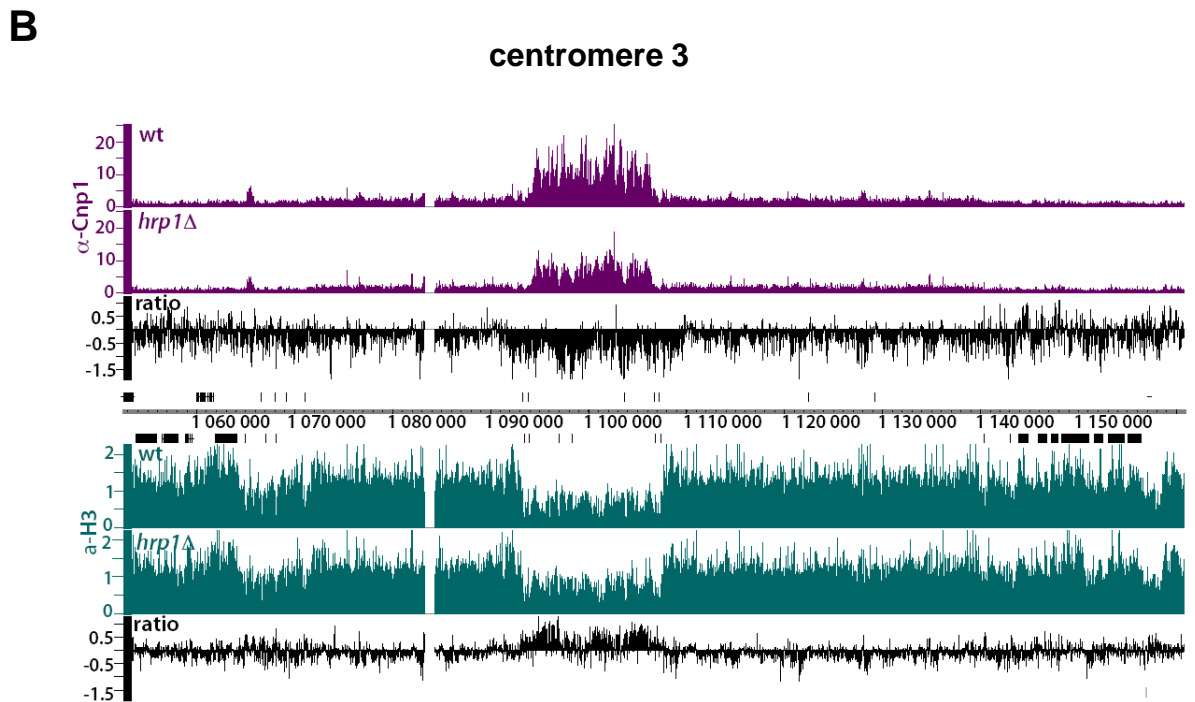

**Supplemental Fig. S1**

The chromosome physical map shows ChIP-chip binding profiles for CENP-A<sup>Cnp1</sup> (purple) and H3 (green) for centromere 2 (A) centromere 3 (B) in wild-type and *hrp1* $\Delta$  (as indicated) cells at 30°C. The relative ratios of CENP-A<sup>Cnp1</sup> and H3 are indicated (black).

Location and orientation of Northern probes (red arrow)

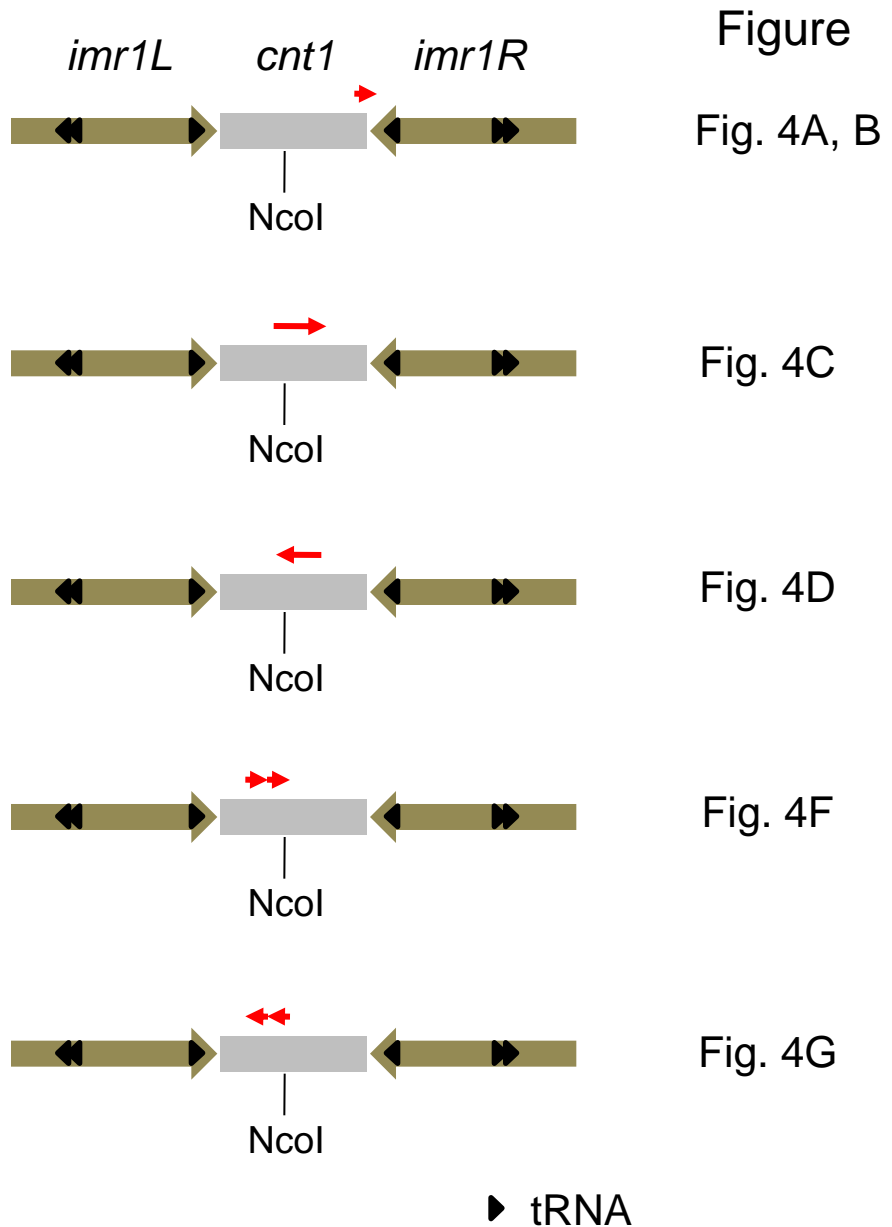

**Supplemental Fig. S2**

Schematic of RNA probes used in Northern analysis. Location and orientation of probes are indicated by red arrows. Probes used in Fig. 4F and Fig. 4G were generated by *in vitro* transcribing a mixture of two relatively short DNA fragments with equal amount in order to maximize production of full length RNA.

**A****5'-RACE-PCR analysis to detect transcription start sites within *cnt1***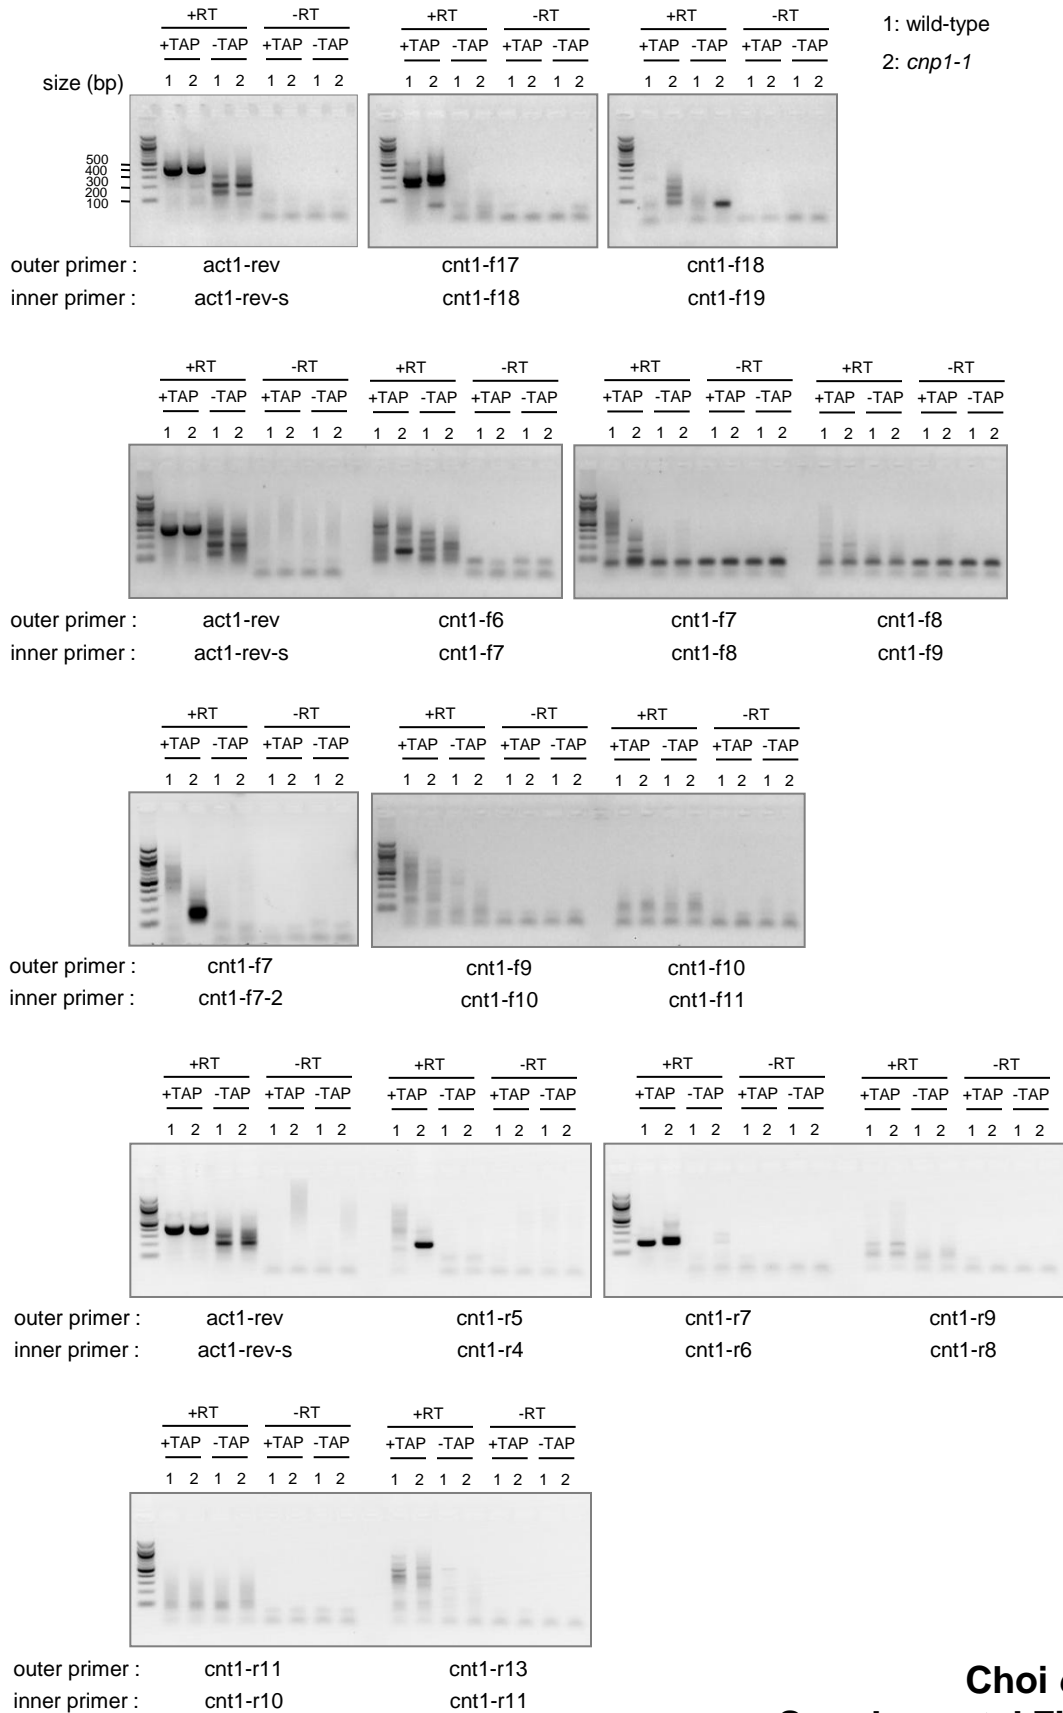

**B**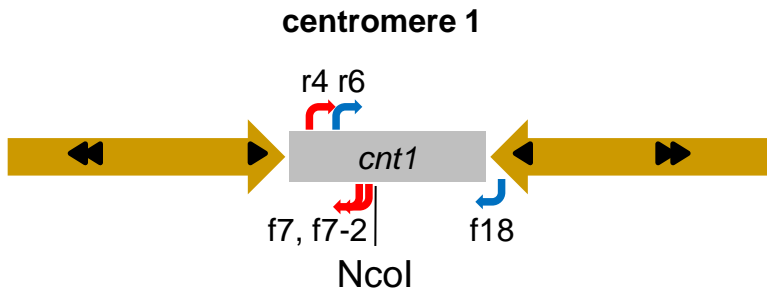

red: transcription starts in *cnt1-1* only

blue: transcription starts in wild-type and *cnt1-1*

**C**

wild-type, f18:

AATTATACTAGCCCTAAGAA

*cnt1-1*, f18:

AATTATACTAGCCCTAAGAA  
 ATAACCACAAATCAACGATT

*cnt1-1*, f7:

ATAACGCCGCGGTCGCCAA

*cnt1-1*, f7-2:

AGACATTACCAACAAAAGA

*cnt1-1*, r4:

GAACTAAAAGTAATCAATAC

wild-type, r6:

ATGAAATACACACCACTCAC

*cnt1-1*, r6:

ATGAAATACACACCACTCAC

### Supplemental Fig. S3

Detection of transcription start sites (TSS) within *cnt1*. (A) RNA ligase mediated (RLM) 5'-RACE-PCR was performed on polyA-selected RNA extracted from wild-type or *cnt1-1* grown at 36°C. -TAP shows that the product from +TAP reaction is specific to the 5' ends of decapped RNA. Outer and inner (nested) PCR Primers specific for *cnt1* or *act1<sup>+</sup>* were described in Supplemental Table 1B. (B) Schematic of representation of transcriptional start sites determined by 5'-RACE-PCR in wild-type and *cnt1-1* cells with utilized inner primers corresponding to each TSS indicated. (C) 20 bp sequences of each TSS in wild-type and *cnt1-1*.

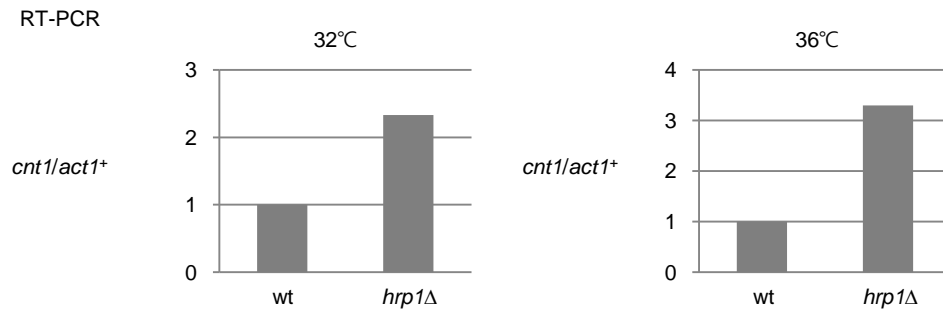

### Supplemental Fig. S4

Loss of Hrp1 causes accumulation of central domain transcripts. RT-PCR analysis to measure levels of central domain transcripts in wt and *hrp1*Δ grown at 32°C or 36°C. Levels of *cnt1* transcripts were calculated relative to *act1*<sup>+</sup> control by qRT-PCR. Bars in the graph indicate fold increase relative to wt.

Choi *et al.*, Supplemental Fig. S4

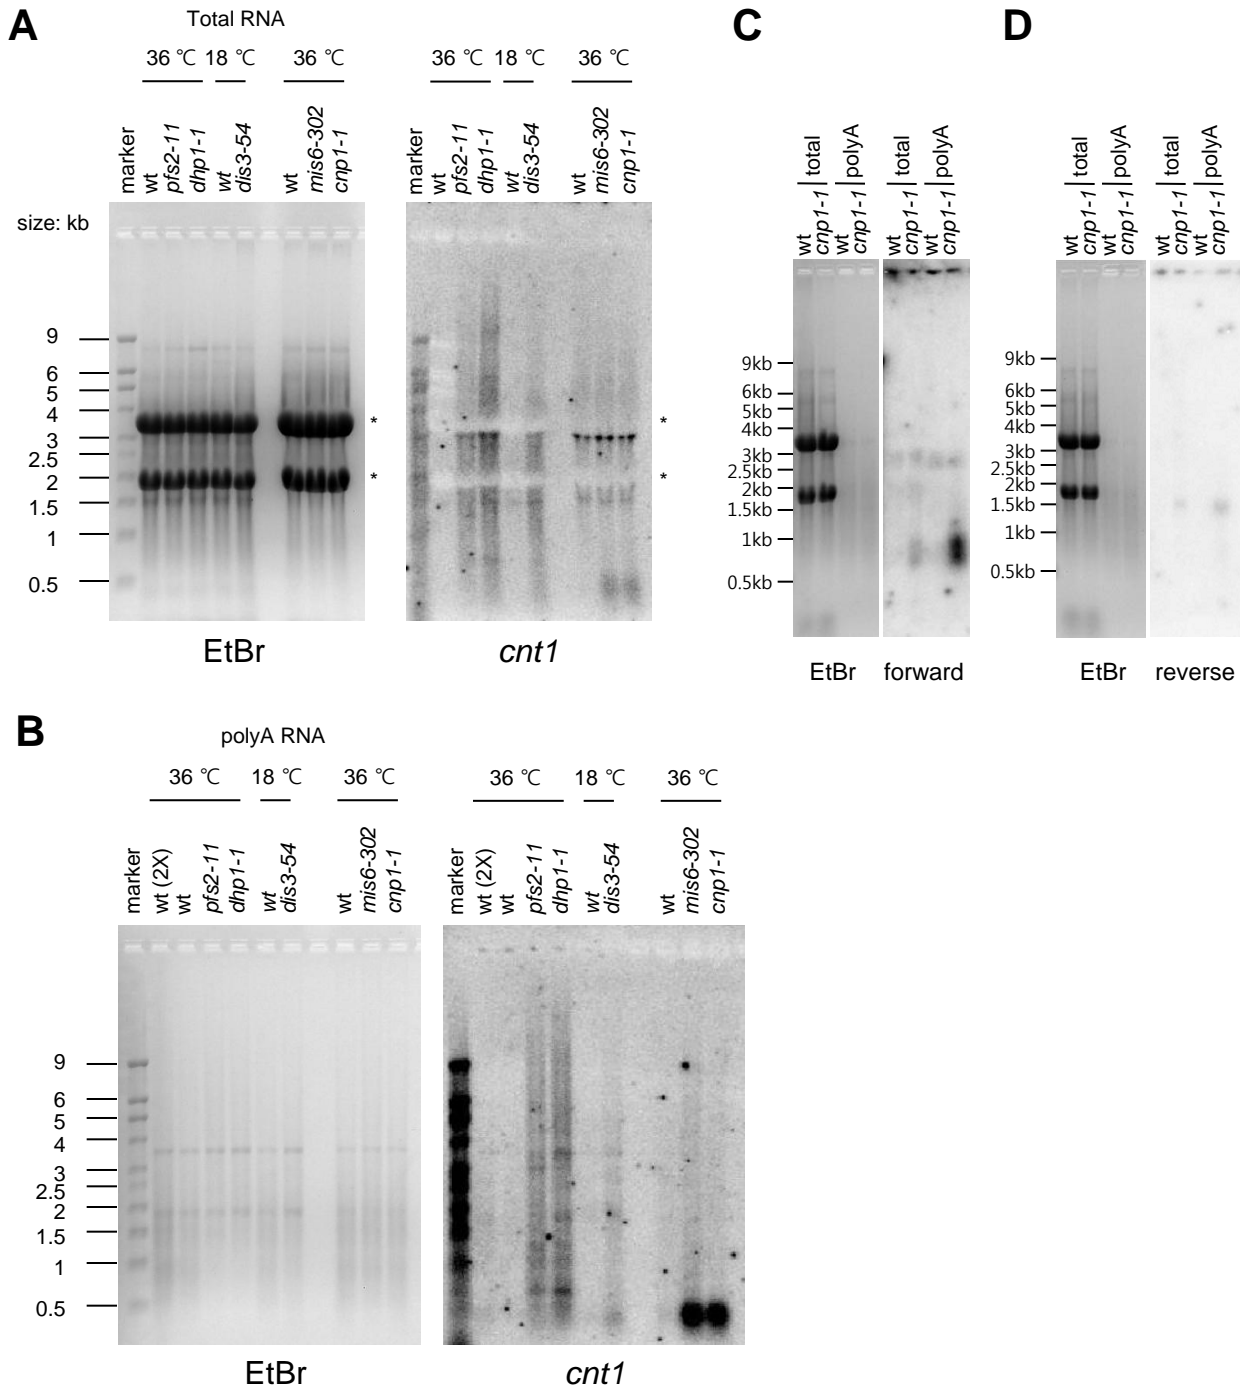

### Supplemental Fig. S5

Images of Ethidium Bromide (EtBr) stained gels used in Northern analysis (inverted). (A) An additional information to Fig. 4A. Asterisk: position of rRNA bands which interfere with hybridization. (B) An additional information to Fig. 4B. Purity of poly(A) RNA after oligo-dT selection is monitored by loss of rRNA bands after EtBr staining. (C,D) Additional informations to Fig. 4C,D.
