# Supplementary material for: Identification of Noncoding Transcripts from within CENP-A Chromatin at Fission Yeast Centromeres
Source: PubMed Central journal article supplement — J Biol Chem. 2011 Apr 29;286(26):23600–7. doi: 10.1074/jbc.M111.228510 (PMC3123123; doi:10.1074/jbc.m111.228510), 2011-04-29
Supplement: supp_M111.228510_jbc.M111.228510-3.pdf [file supp_M111.228510_jbc.M111.228510-3.pdf]

**Supplemental Table 1. List of primers used in this study. (A) Primers used in RT-PCR and ChIP analysis**

| Primer      | Sequence                   | Figure           |
|-------------|----------------------------|------------------|
| cen1-1-for  | AGACTGTTGTTGAGTGCTGTG      | Fig. 3B          |
| cen1-1-rev  | ATTTGCCTGTTGTACATTTTTGC    | Fig. 3B          |
| cen1-2-for  | CACATCATCGTCGTAACAT        | Fig. 3B          |
| cen1-2-rev  | GATATCATCTATATTTAATGACTACT | Fig. 3B          |
| cen1-3-for  | CATAATGTCACATTTTCGTCC      | Fig. 3B          |
| cen1-3-rev  | TGAGAATTAATGTGTTTGCC       | Fig. 3B          |
| cen1-4-for  | TTTGGACAAGCCAGAAGCTCG      | Fig. 3B          |
| cen1-4-rev  | TTGTGTGAACTAAGCATCCG       | Fig. 3B          |
| cen1-5-for  | ATAGTTATTGAAAGGCTGCG       | Fig. 3B          |
| cen1-5-rev  | CGACTTTGTAATTTGTCCAG       | Fig. 3B          |
| cen1-6-for  | TTGAAAGAGCTTGACACGTTTT     | Fig. 3B          |
| cen1-6-rev  | TTCCTGCTGAGGCTAAGTATCTG    | Fig. 3B          |
| cen1-7-for  | GAACGTCTTTCAGGCTTTGC       | Fig. 3B          |
| cen1-7-rev  | CCTACACTCAACCGCATAGGA      | Fig. 3B          |
| cen1-8-for  | CAAAAGTATGGCAAGAGTGG       | Fig. 3B          |
| cen1-8-rev  | TGAAACTTTGTGACATTGCC       | Fig. 3B          |
| cen1-9-for  | GCTTTATCATAGTATTTTAGGC     | Fig. 3B          |
| cen1-9-rev  | AATACTTGGTATGTTAAAGTGG     | Fig. 3B          |
| cen1-10-for | AACAATAAACACGAATGCCTC      | Fig. 3B          |
| cen1-10-rev | ATAGTACCATGCGATTGTCTG      | Fig. 3B          |
| qCnt1F      | CAGACAATCGCATGGTACTATC     | Fig. 1C, Fig. S4 |
| qCnt1R      | AGGTGAAGCGTAAGTGAGTG       | Fig. 1C, Fig. S4 |
| qAct1F      | CCCAAATCCAACCGTGAGAAGATG   | Fig. 1C, Fig. S4 |
| qAct1R      | CCAGAGTCCAAGACGATACCAGTG   | Fig. 1C, Fig. S4 |
| cnt2-for    | TTTGCTGAACAAGACTTGCGTATG   | Fig. 3C          |
| cnt2-rev    | AGTCATTCTAGGGTTTGCCAACAC   | Fig. 3C          |
| cnt3-for    | GCTAGAATAGAACAGATACCCA     | Fig. 3C          |
| cnt3-rev    | ATTACAACGACGAAAGCCTC       | Fig. 3C          |

(B) Primers used in 5'-RACE-PCR

| Primer     | Sequence                    | Figure           |
|------------|-----------------------------|------------------|
| act1-rev   | GAGTCCAAGACGATACCAAGT       | Fig. 4E, Fig. S3 |
| act1-rev-s | AGGAGCCTCAGTCAACAAGC        | Fig. 4E, Fig. S3 |
| cnt1-f6    | CAAAAGTCGCACACATTCTTG       | Fig. 4E, Fig. S3 |
| cnt1-f7    | CAACTTACATCAGCATACTGG       | Fig. 4E, Fig. S3 |
| cnt1-f7-2  | TGTAAAGTAACAGATATGTTTCGCAAT | Fig. 4E, Fig. S3 |
| cnt1-f8    | CAGAAGGTATTAGTGGTCGG        | Fig. 4E, Fig. S3 |
| cnt1-f9    | TCGCCGGTAACAAAAGGATC        | Fig. 4E, Fig. S3 |
| cnt1-f10   | TATTCCTTAACTCATCATGC        | Fig. 4E, Fig. S3 |
| cnt1-f11   | TAAAGATAGCTTAAAGTAATG       | Fig. 4E, Fig. S3 |
| cnt1-f17   | ACGATACAAATACTGACGCC        | Fig. 4E, Fig. S3 |
| cnt1-f18   | GGTTGCTAATAAGTATCAGG        | Fig. 4E, Fig. S3 |
| cnt1-f19   | TATCCTAAAGTCAAAAAGAGC       | Fig. 4E, Fig. S3 |
| cnt1-r7    | AGTATGCTGATGTAAGTTGC        | Fig. 4E, Fig. S3 |
| cnt1-r8    | CCGACCACTAATACCTTCTG        | Fig. 4E, Fig. S3 |
| cnt1-r9    | TGATCCTTTTGTACCGCG          | Fig. 4E, Fig. S3 |
| cnt1-r10   | CGTTTAATGCATGATGAGTTAAGG    | Fig. 4E, Fig. S3 |
| cnt1-r11   | GATATTTTACTTAAAGCTATC       | Fig. 4E, Fig. S3 |
| cnt1-r13   | TCTCGTACCGGTTTAAAGAG        | Fig. 4E, Fig. S3 |

(C) Primers used in the generation of Northern probes

| Primer      | Sequence                                       | Figure    |
|-------------|------------------------------------------------|-----------|
| T7_cnt1-f17 | TAATACGACTCACTATAGGGGAGAACGATACAAATACTGACGCC   | Fig. 4A-B |
| cnt1-r19    | AAAGCTCTTTTACTTTAGG                            | Fig. 4A-B |
| T7_cnt1-f7  | TAATACGACTCACTATAGGGGAGACAACCTTACATCAGCATACTGG | Fig. 4C   |
| cnt1-r12    | GCTTGCTCTTTTCGTTCTG                            | Fig. 4C   |
| T7_cnt1-r12 | TAATACGACTCACTATAGGGGAGAGCTTGCTCTTTTCGTTCTG    | Fig. 4D   |
| cnt1-f8     | CAGAAGGTATTAGTGGTCGG                           | Fig. 4D   |
| T7_cnt1-f4  | TAATACGACTCACTATAGGGGAGACATTTATAGTATTAATCAACG  | Fig. 4F   |
| cnt1-r6     | AGAATGTGTGCGACTTTTGG                           | Fig. 4F   |
| T7_cnt1_f6  | TAATACGACTCACTATAGGGGAGACAAAAGTCGCACACATTCTTG  | Fig. 4F   |
| cnt1-r8     | CCGACCACTAATACCTTCTG                           | Fig. 4F   |
| T7_cnt1-r6  | TAATACGACTCACTATAGGGGAGAAGAATGTGTGCGACTTTTGG   | Fig. 4G   |
| cnt1-f4     | CATTTATAGTATTAATCAACG                          | Fig. 4G   |
| T7_cnt1-r8  | TAATACGACTCACTATAGGGGAGACCGACCACTAATACCTTCTG   | Fig. 4G   |
| cnt1-f6     | CAAAAGTCGCACACATTCTTG                          | Fig. 4G   |

**Supplemental Table 2. List of strains used in this study.**

Genotypes of strains used. For strains marked with an asterisk (\*) only the relevant genotype is listed.

| <b>Strain</b> | <b>Genotype</b>                                                                                 |
|---------------|-------------------------------------------------------------------------------------------------|
| 972           | <i>h<sup>-</sup></i>                                                                            |
| 7125          | <i>h<sup>-</sup> pfs2-11 *</i>                                                                  |
| 7127          | <i>h<sup>-</sup> dhp1-1(EcoRV)::ura4<sup>+</sup> ade6-216 ura4-D18 leu1-32</i>                  |
| 6519          | <i>h<sup>-</sup> dis3-54 *</i>                                                                  |
| 2919          | <i>h<sup>-</sup> mis6-302 leu1-32</i>                                                           |
| 6960          | <i>h<sup>-</sup> cnp1Δ::ura4<sup>+</sup> lys1<sup>+</sup>:cnp1-1 leu1-32 ura4<sup>-</sup></i>   |
| 3828          | <i>h<sup>-</sup> mis12-537 *</i>                                                                |
| A590          | <i>h<sup>+</sup> mis16-53 *</i>                                                                 |
| A592          | <i>h<sup>+</sup> mis18-262 *</i>                                                                |
| 3043          | <i>h<sup>+</sup> cnt1:arg3<sup>+</sup> ade6-210 leu1-32 arg3-D3 his3-D1 ura4<sup>-</sup></i>    |
| 4517          | <i>h<sup>+</sup> cnt1:arg3<sup>+</sup> cnp1-169 ade6-210 leu1-32 ura4-D18 arg3-D4 his3-D1 *</i> |
| A867          | <i>h cnt1:arg3<sup>+</sup> hrp1Δ::LEU2 ade6-210 ura4<sup>-</sup> leu1-32 his3-D1 arg3-D4</i>    |
| 7430          | <i>h<sup>-</sup> hrp1Δ::LEU2 leu1-32 ura4-DS/E ade6-210</i>                                     |
| A851          | <i>h mis6-302 hrp1Δ::LEU2 ade6-210 leu1-32 ura4<sup>-</sup></i>                                 |
| 4761          | <i>h<sup>+</sup> cnp1-87 ade6-210 leu1-32 ura4-D18 his3-D1 arg3-D4</i>                          |
| A639          | <i>h cnp1-87 hrp1Δ::LEU2 leu1-32 *</i>                                                          |
| A851          | <i>h mis6-302 hrp1Δ::LEU2 leu1-32 *</i>                                                         |
| Hu29          | <i>h<sup>-</sup> ade6-210 leu1-32 ura4-D18</i>                                                  |
| Hu8           | <i>h<sup>-</sup> hrp1Δ::ura4<sup>+</sup> ade6-216 leu1-32 ura4-D18</i>                          |
